# Supplementary material
Source: publisher figshare collection journal article supplement (https://acs.figshare.com/ndownloader/files/13190249)
Supplement: Supplementary file 1 [file 13190249]

## Supporting Information

### **GNE-371, a potent and selective chemical probe for the second bromodomains of human transcription initiation factor TFIIID subunit 1 (TAF1) and transcription initiation factor TFIIID subunit 1-like (TAF1L)**

*Shumei Wang,† Vickie Tsui,† Terry D. Crawford,†\* James E. Audia,‡ Daniel J. Burdick,† Maureen H. Beresini,† Alexandre Côté, Richard Cummings,‡ Martin Duplessis,‡ E. Megan Flynn,† Michael C. Hewitt,‡ Hon-Ren Huang,‡ Hariharan Jayaram,‡ Ying Jiang,§ Shivangi Joshi,‡ Jeremy Murray,† Christopher G. Nasveschuk,‡ Eneida Pardo,‡ Florence Poy,‡ F. Anthony Romero,† Yong Tang,‡ Alexander M. Taylor,‡ Jian Wang,§ Zhaowu Xu,§ Laura E. Zawadzke,‡ Xiaoyu Zhu,§ Brian K. Albrecht,‡ Steven R. Magnuson,† Steve Bellon,‡ Andrea G. Cochran†*

†Genentech Inc., 1 DNA Way, South San Francisco, CA 94080

‡Constellation Pharmaceuticals, 215 First Street, Suite 200, Cambridge, MA 02142

§Wuxi AppTec Co., Ltd., 288 Fute Zhong Road, Waigaoqiao Free Trade Zone, Shanghai 200131, People's Republic of China

---

**Table of Contents**

|                                                                                           | <b>Page</b>   |
|-------------------------------------------------------------------------------------------|---------------|
| <b>Protein and assay methods</b>                                                          | <b>S3</b>     |
| <b>TAF1(2) bromodomain cellular assay</b>                                                 | <b>S3</b>     |
| <b>Crystallography Methods</b>                                                            | <b>S4</b>     |
| <b>Table S1. Data collection and refinement for compounds 8 &amp; 27 bound to TAF1(2)</b> | <b>S4-5</b>   |
| <b>Figure S1. Electron density for compound 8</b>                                         | <b>S6</b>     |
| <b>Figure S2. Bliss synergy calculation for 27 and JQ1</b>                                | <b>S6</b>     |
| <b>Table S2. Assay data with standard deviations</b>                                      | <b>S7</b>     |
| <b>Table S3. BROMOscan® selectivity assay</b>                                             | <b>S8</b>     |
| <b>Table S4. Invitrogen Kinase selectivity assay</b>                                      | <b>S9</b>     |
| <b>LCMS and HRMS traces for compound 27</b>                                               | <b>S10-11</b> |
| <b>Supporting Information references</b>                                                  | <b>S12</b>    |

---

## Protein expression and purification methods

Production of bromodomain proteins was carried out as previously described<sup>1</sup>. TR-FRET assay conditions have been reported previously.<sup>2, 3</sup>

**Synthesis of biotinylated probes for TR-FRET assays.** The synthesis and characterization of biotinylated probe molecules has been previously reported.<sup>2</sup>

**Cell-based assays.** Target engagement in cells was assessed by displacement of a fluorescent tagged ligand from nanoLuc (nLuc; Promega) luciferase-bromodomain fusion proteins. For the BRD4 assay, 293T cells were grown in DMEM medium (low glucose) supplemented with 2 mM glutamine and 10% fetal bovine serum. Cells were trypsinized, counted and resuspended at  $2 \times 10^5$  cells/mL. Cells were transfected transiently using FuGENE HD Transfection Reagent (Promega) with 9:1 carrier DNA: nLuc-full-length BRD4 fusion construct (10 µg total DNA; 20 mL cells). Cells were plated and grown for 24 h at 37 °C, 5% CO<sub>2</sub>. Cells were isolated and resuspended in assay medium (OptiMem I reduced serum medium lacking phenol red; Gibco) at  $2 \times 10^5$  cells/mL and plated in white 96-well plates with tracer (0.5 µM final concentration) according to the supplier's instructions (90 µL total volume). Serially diluted compound (10 µL; top final concentration of 20 µM) was added to wells (0.2% DMSO final concentration). After incubation as described, plates were processed by addition of substrate and read according to the supplier's instructions on a GloMax GM3000 reader (Promega). The ratio of acceptor emission (610 nm) to donor emission (450 nm) was corrected by subtracting the value for the no-tracer control and multiplied by 1000 to yield a final value in milliBRET units (mBu). The TAF1(2) assay was carried out in a similar manner, using instead an N-terminal nLuc-TAF1(2) aa 1494–1698 fusion construct and the tracer probe.

To assess the effect of inhibition of TAF1(2) on BRD4 inhibition, H23 viability was determined using CellTiter-Glo 2.0 (Promega). Cells were cultured in RPMI-1640 supplemented with 2 mM glutamine and 10% fetal bovine serum. One day preceding compound addition, cells were plated at 5000 cells/well in white 96-well culture plates. Compound dilutions and mixtures were prepared at 500x final concentration in 100% DMSO then diluted with fresh medium. Wells were aspirated to remove medium, and compound medium (100 µL) was added to triplicate wells. Cells were grown for an additional 48 h (37 °C, 5% CO<sub>2</sub>). Plates were equilibrated to room temperature before adding CellTiter-Glo reagent and incubating briefly to develop signal. Luminescence was read on a Wallac Victor<sup>3</sup>V 1420 Multilabel Counter (Perkin Elmer). Average luminescence values were converted to percent inhibition according to the equation:

$$\% \text{ inhibition} = (1 - ((\text{value} - \text{MIN}) / (\text{MAX} - \text{MIN}))) * 100,$$

where MAX is the average of luminescence from vehicle treated wells and MIN is the fitted lower baseline of the JQ1 inhibition curve at the highest concentration of GNE-371. Percent inhibition values from two independent experiments were averaged and provided as input to the web implementation of the program SynergyFinder<sup>5</sup>, using the Bliss model with optional baseline correction.

**Crystallography methods.** Crystallographic methods, analysis, and refinement information for Compound **1** bound to BRD4(1) and compound **2** bound to TAF1(2) has been previous reported.<sup>2</sup>

The co-crystal structures of TAF1-BD2 with **8** & **27** were obtained by incubating 3.3 mM of each compound with protein at a concentration of 19.9 mg/mL (1.2 mM) in 20mM HEPES, pH 7.5, 150mM NaCl, 1mM TCEP. Crystals were then grown at 4°C using the sitting drop vapor diffusion technique by equilibrating the protein:ligand complexes against a solutions containing 25% PEG1500 (**8**) or 0.1 M BIS-TRIS pH 6.5, 28% w/v PEG MME 2,000 (**27**). TAF1-BD2-**8** crystals were flash frozen in liquid nitrogen using a 1:1 mix of Paratone-N and Mineral oil and data was collected at APS beamline 21ID-G. The TAF1-BD2-**27** complex crystals were cryo-protected by the addition of 20% ethylene glycol to the well solution and data was collected at SSRF beamline 17U1.

**Table S1.** Data collection and refinement statistics for TAF1-BD2 in complex with **8** & **27**

|                                       | <b>TAF1-BD2 Cpd8</b>          | <b>TAF1-BD2 Cpd27</b>           |
|---------------------------------------|-------------------------------|---------------------------------|
| <i>PDB-ID</i>                         | 6DF4                          | 6DF7                            |
| <i>Beamline</i>                       | LS-CAT 21ID-G                 | SSRF 17U1                       |
| <i>Wavelength</i>                     | 0.9786                        | 0.97923                         |
| <i>Resolution range</i>               | 12.88 - 1.30<br>(1.35 - 1.30) | 41.9 - 2.003<br>(2.075 - 2.003) |
| <i>Space group</i>                    | P21221                        | P212121                         |
| <i>Unit cell</i>                      | 47.81 59.65 60.58 90 90 90    | 52.42 79.70 83.83 90 90 90      |
| <i>Total reflections</i>              | 307,048                       | 157,471                         |
| <i>Unique reflections</i>             | 43,100 (4,240)                | 22,773 (1,166)                  |
| <i>Multiplicity</i>                   | 7.1 (7.0)                     | 6.9 (7.4)                       |
| <i>Completeness (%)</i>               | 99.65 (99.24)                 | 93.8 (100)                      |
| <i>Mean I/sigma(I)</i>                | 32.2 (3.2)                    | 12.9 (0.9)                      |
| <i>Wilson B-factor</i>                | 14.48                         | 43.04                           |
| <i>R-pim</i>                          |                               | 0.035 (0.792)                   |
| <i>R-merge</i>                        | 0.051 (0.701)                 | 0.068 (0.57)                    |
| <b>Refinement</b>                     |                               |                                 |
| <i>Reflections used in refinement</i> | 43011 (4192)                  | 22749 (1790)                    |
| <i>Reflections used for R-free</i>    | 2166 (229)                    | 1131 (79)                       |
| <i>R-work</i>                         | 0.169 (0.229)                 | 0.192 (0.314)                   |
| <i>R-free</i>                         | 0.187 (0.224)                 | 0.235 (0.287)                   |
| <i>Number of non-hydrogen atoms</i>   | 1446                          | 2345                            |
| <i>macromolecules</i>                 | 1110                          | 2095                            |
| <i>ligands</i>                        | 28                            | 64                              |
| <i>solvent</i>                        | 308                           | 186                             |

|                                      |       |       |
|--------------------------------------|-------|-------|
| <i>Protein residues</i>              | 134   | 256   |
| <i>RMS(bonds)</i>                    | 0.013 | 0.014 |
| <i>RMS(angles)</i>                   | 1.49  | 1.58  |
| <i>Ramachandran<br/>favored (%)</i>  | 99.24 | 99.6  |
| <i>Ramachandran<br/>allowed (%)</i>  | 0.76  | 0.4   |
| <i>Ramachandran<br/>outliers (%)</i> | 0     | 0     |
| <i>Rotamer outliers (%)</i>          | 0     | 2.9   |
| <i>Clashscore</i>                    | 0.9   | 1.43  |
| <i>Average B-factor</i>              | 19.91 | 50.37 |
| <i>macromolecules</i>                | 16.72 | 49.77 |
| <i>ligands</i>                       | 12.07 | 39.06 |
| <i>solvent</i>                       | 32.15 | 61.04 |

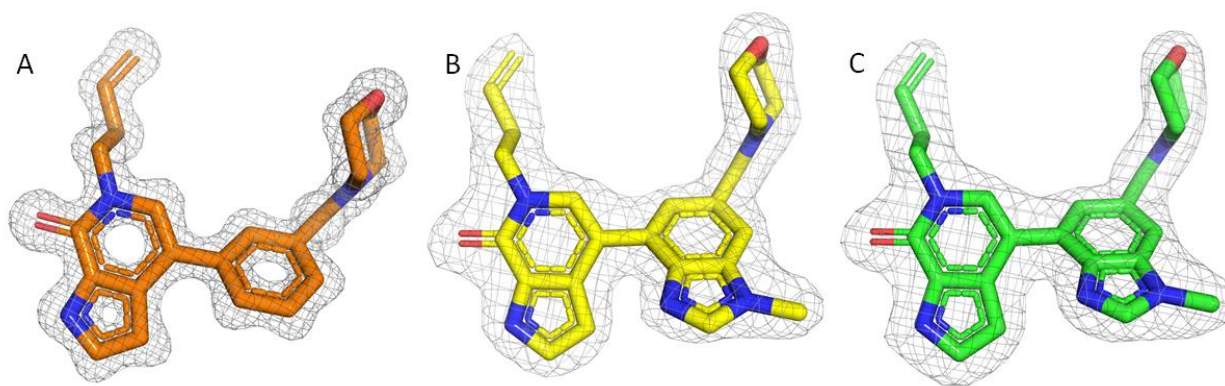

**Supplementary Figure S1.** (A) 1.3Å resolution Sigma-A weighted 2mFo-DFc\* electron density map of compound **8** contoured at 1sigma. (B) & (C) 2.0Å resolution Sigma-A weighted 2mFo-DFc\* electron density map of compound **27** contoured at 1sigma (from 2 molecules of the TAF1(2)-Cpd**27** complex in the asymmetric unit, B & C represent **27** bound to each of these TAF molecules. (\*where m is the figure of merit, and D is the Sigma-A weighting factor).

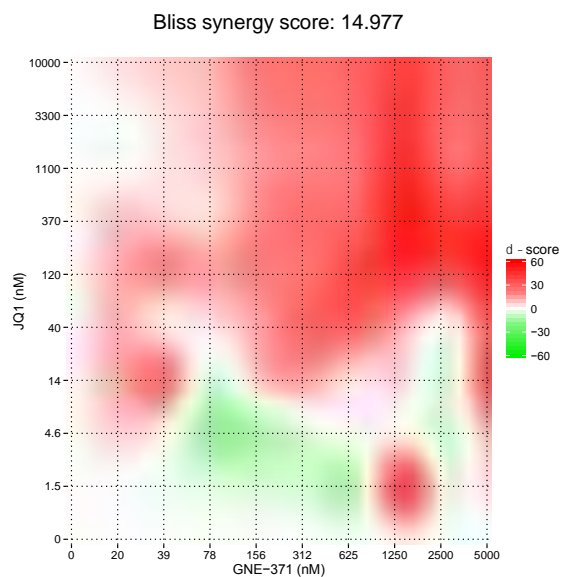

**Supplementary Figure S2.** Bliss synergy calculation for H23 cells co-treated with **JQ1** and **GNE-371**. The overall synergy score is 15, with a maximum Bliss score of 43.

**Table S2.** TR-FRET assay data for compounds Tables 1 and 2 including standard deviations.

| Compound | IC50 (uM)     |           |             |             |             |             |
|----------|---------------|-----------|-------------|-------------|-------------|-------------|
|          | TAF1(2)       | TAF1(1)   | BRD4(1)     | BRD4(2)     | BRD9        | CECR2       |
| 1        | 0.059 ± 0.02  | 3.6 ± 0.8 | 0.09 ± 0.02 | 0.65 ± 0.01 | 0.2 ± 0.1   | 0.24 ± 0.3  |
| 2        | 0.046 ± 0.005 | 9.9 ± 1   | 2.5 ± 0.3   | 5.5 ± 0.7   | 1.4 ± 0.3   | 4.8 ± 0.1   |
| 3        | 0.046 ± 0.01  | 17 ± 1    | 0.69 ± 0.07 | 1.5 ± 0.0   | 1.8 ± 0.0   | 2.9 ± 1     |
| 4        | 0.035 ± 0.005 | 16 ± 2    | 0.76 ± 0.05 | 1.9 ± 0.1   | 1.9 ± 0.1   | 4.7 ± 1     |
| 5        | 0.067 ± 0.009 | 13 ± 2    | 0.75 ± 0.1  | 2.4 ± 0.1   | 1.7 ± 0.1   | 4.0 ± 0.7   |
| 6        | 0.089 ± 0.02  | 9.5 ± 1   | 1.5 ± 0.1   | 5.0 ± 0.0   | 0.90 ± 0.06 | 0.55 ± 0.1  |
| 7        | 0.083 ± 0.009 | 14 ± 3    | 3.2 ± 0.0   | 5.0 ± 0.0   | 0.89 ± 0.01 | 1.1 ± 0.1   |
| 8        | 0.023 ± 0.006 | 11 ± 1    | 1.0 ± 0.4   | 6.9 ± 0.3   | 1.5 ± 0.5   | 3.3 ± 0.6   |
| 9        | 0.017 ± 0.003 | 15 ± 2    | 1.2 ± 0.1   | 5.0 ± 0.2   | 1.6 ± 0.1   | 2.2 ± 0.4   |
| 10       | 0.026 ± 0.004 | 4.3 ± 0.3 | 0.48 ± 0.01 | 4.0 ± 0.2   | 0.88 ± 0.03 | 2.3 ± 0.4   |
| 11       | 0.006 ± 0.003 | 6.1 ± 0.7 | 0.60 ± 0.1  | 9.0 ± 0.5   | 0.96 ± 0.02 | 0.69 ± 0.1  |
| 12       | 0.015 ± 0.004 | 8.1 ± 0.0 | 1.8 ± 0.1   | 5.0 ± 0.0   | 3.0 ± 0.4   | 0.35 ± 0.09 |
| 13       | 0.010 ± 0.001 | 9.6 ± 1   | 5.1 ± 0.6   | 11 ± 0      | 1.4 ± 0.1   | 1.8 ± 0.3   |
| 14       | 0.006 ± 0.000 | 9.7 ± 2   | 5.0 ± 0.0   | 5.0 ± 0.0   | 0.86 ± 0.3  | 2.0 ± 0.2   |
| 15       | 0.035 ± 0.01  | 15 ± 3    | 5.0 ± 0.0   | 5.0 ± 0.0   | 1.0 ± 0.0   | 5.0 ± 1     |
| 16       | 0.011 ± 0.004 | 11 ± 1    | 7.9 ± 1     | 17 ± 1      | 2.2 ± 0.3   | 2.1 ± 0.5   |
| 17       | 0.016 ± 0.004 | 11 ± 4    | 3.2 ± 0.3   | 5.0 ± 0     | 2.1 ± 0.4   | 0.83 ± 0.2  |
| 18       | 0.013 ± 0.004 | 9.3 ± 2   | 16 ± 2      | 13 ± 1      | 2.0 ± 0.6   | 1.7 ± 0.3   |
| 19       | 0.007 ± 0.002 | 6.9 ± 0.6 | 8.6 ± 0.9   | 10 ± 1      | 1.7 ± 0.5   | 1.0 ± 0.1   |
| 20       | 0.004 ± 0.003 | 5.3 ± 0.4 | 6.3 ± 1     | 7.6 ± 0.3   | 1.6 ± 0.1   | 0.59 ± 0.1  |
| 21       | 0.016 ± 0.003 | 5.9 ± 0.4 | 2.3 ± 0.1   | 4.4 ± 0.0   | 2.2 ± 0.2   | 0.82 ± 0.01 |
| 22       | 0.010 ± 0.001 | 7.0 ± 2   | 3.6 ± 0.2   | 4.4 ± 0.2   | 1.4 ± 0.4   | 0.23 ± 0.2  |
| 23       | 0.016 ± 0.004 | 8.4 ± 6   | 8.2 ± 0.9   | 12.4 ± 0.6  | 0.75 ± 0.1  | 2.6 ± 0.2   |
| 24       | 0.016 ± 0.04  | >20       | 2.0 ± 0.1   | 1.0 ± 0.0   | 2.4 ± 2     | 2.6 ± 1.1   |
| 25       | 0.006 ± 0.005 | 6.8 ± 1   | 3.4 ± 0.4   | 6.8 ± 0.2   | 0.62 ± 0.03 | 0.59 ± 0.2  |
| 26       | 0.028 ± 0.01  | >20       | >20         | >20         | 18 ± 1      | 1.1 ± 2     |
| 27       | 0.010 ± 0.002 | >20       | >20         | >20         | 9.5 ± 2     | 1.2 ± 0.1   |

**Table S3.** BROMOscan<sup>®</sup> bromodomain selectivity data for compound **27** (GNE-371) provided by DiscoverX Corp., Fremont, CA, USA, <http://www.discoverx.com>. This screen measured binding competition against immobilized ligands for 40 DNA-tagged bromodomains. Compound K<sub>D</sub> values are averages of 2 independent experiments.

| Target    | GNE-371<br>K <sub>D</sub> (nM) | Target                               | GNE-371<br>K <sub>D</sub> (nM) | Target             | GNE-371<br>K <sub>D</sub> (nM) |
|-----------|--------------------------------|--------------------------------------|--------------------------------|--------------------|--------------------------------|
| ATAD2A    | >10000                         | BRD4(2)                              | >10000                         | EP300              | >10000                         |
| ATAD2B    | >10000                         | BRD4<br>(full-length,<br>Short-iso.) | 8900                           | FALZ               | >10000                         |
| BAZ2A     | >10000                         | BRD7                                 | >10000                         | GCN5L2             | >10000                         |
| BAZ2B     | >10000                         | BRD8(1)                              | >10000                         | PBRM1(2)           | >10000                         |
| BRD1      | >10000                         | BRD8(2)                              | >10000                         | PBRM1(5)           | >10000                         |
| BRD2(1)   | >10000                         | BRD9                                 | 3400                           | PCAF               | >10000                         |
| BRD2(1,2) | >10000                         | BRDT(1)                              | >10000                         | SMARCA2            | >10000                         |
| BRD2(2)   | >10000                         | BRDT(1,2)                            | >10000                         | SMARCA4            | >10000                         |
| BRD3(1)   | >10000                         | BRDT(2)                              | >10000                         | TAF1(2)            | 1.2                            |
| BRD3(1,2) | >10000                         | BRPF1                                | >10000                         | TAF1L(2)           | 5.2                            |
| BRD3(2)   | >10000                         | BRPF3                                | >10000                         | TRIM24(Bromo.)     | >10000                         |
| BRD4(1)   | >10000                         | CECR2                                | 1200                           | TRIM24(PHD,Bromo.) | >10000                         |
| BRD4(1,2) | >10000                         | CREBBP                               | >10000                         | TRIM33(PHD,Bromo.) | >10000                         |
|           |                                |                                      |                                | WDR9(2)            | >10000                         |

**Table S4.** Kinase selectivity data for Compound **27** (GNE-371). Invitrogen panel of 35 kinases, percent inhibition at 1.0  $\mu$ M.

| <b>Kinase</b> | <b>GNE-371 @ 1.0 <math>\mu</math>M</b> | <b>Kinase</b>     | <b>GNE-371 @ 1.0 <math>\mu</math>M</b> |
|---------------|----------------------------------------|-------------------|----------------------------------------|
| AKT1          | 2.5                                    | MAP4K4            | 5.5                                    |
| Abl           | 11                                     | MEK1              | -1                                     |
| Aurora_B      | -1                                     | MST3              | 3                                      |
| CDK2/cyclinA  | 1.5                                    | MYLK3(caMLCK)     | 1.5                                    |
| CDK5/p25      | -1                                     | Mink1             | 6                                      |
| CHK1          | 6.5                                    | MuSK              | 0                                      |
| CLK2          | 5.5                                    | PIM1              | -2.5                                   |
| CSF1R         | 3.5                                    | PKA               | 2                                      |
| DMPK          | 0                                      | PLK1              | -5                                     |
| EphA1         | 3.5                                    | RIPK2             | -3                                     |
| Flt3          | 2.5                                    | RSK3              | 4                                      |
| GSK3_beta     | 3                                      | Ret               | 1.5                                    |
| IRAK4         | 5.5                                    | SIK2              | -4                                     |
| InsR          | 8                                      | Src               | 4.5                                    |
| JAK1          | -2                                     | TGFBR1            | -1.5                                   |
| JNK1_alpha1   | 4                                      | TrkA              | 16.5                                   |
| Lck           | 16.5                                   | Yes               | 5.5                                    |
|               |                                        | p38_alpha(direct) | 2                                      |

# LCMS trace of compound 27

## MS Report

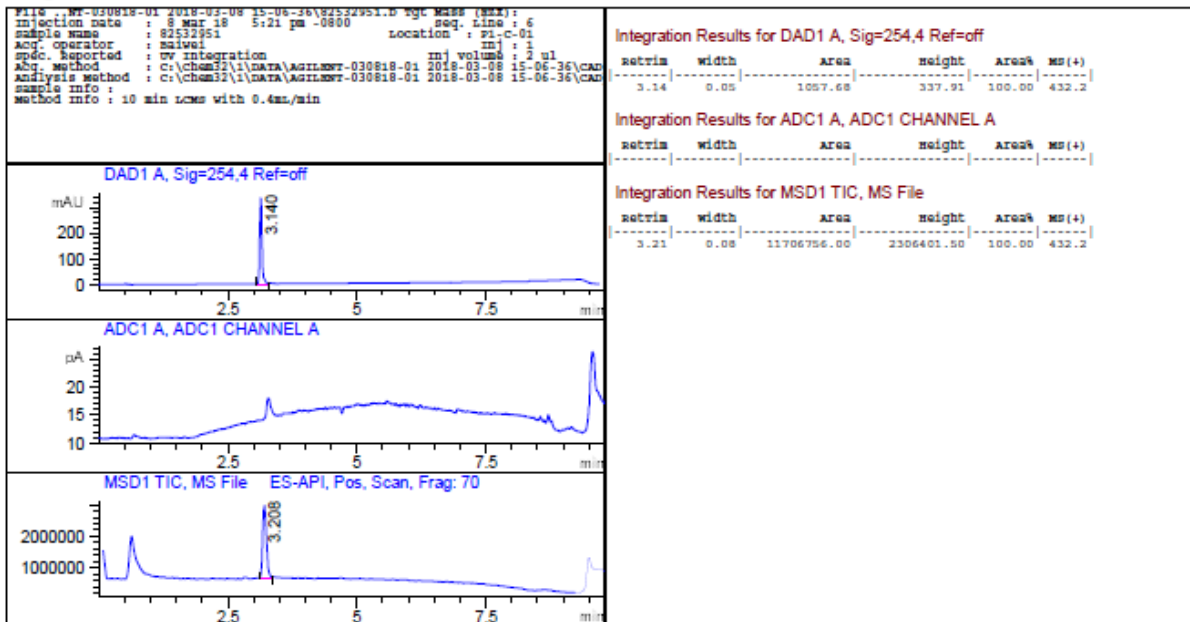

Ret. Time: 3.14

<<<< POSITIVE SPECTRA >>>>

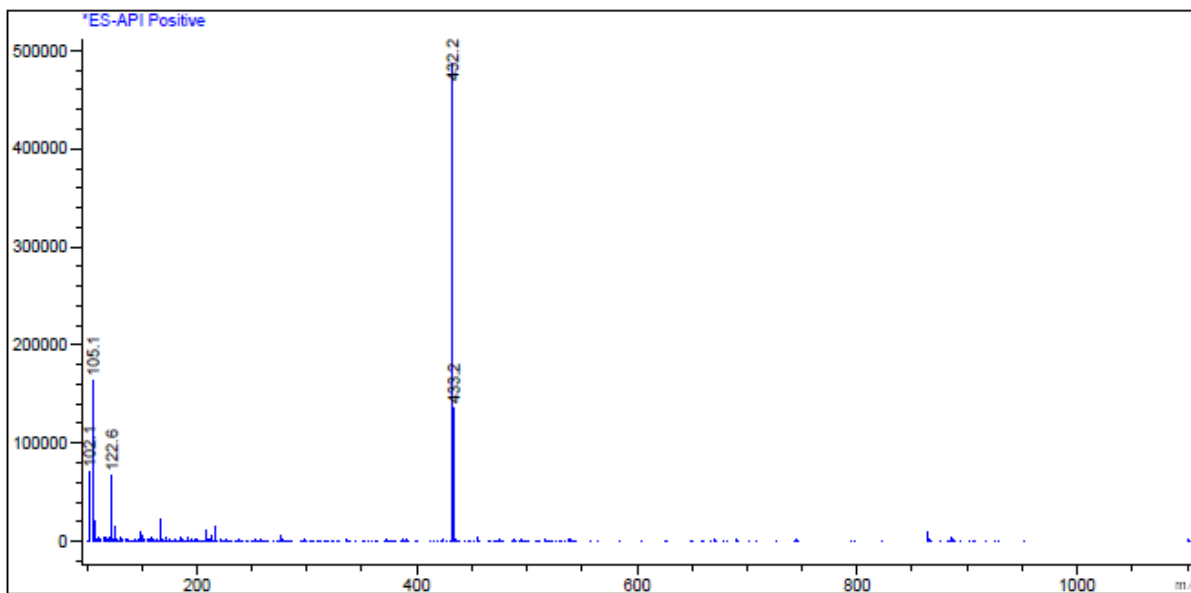

# HRMS trace for Compound 27:

D:\KEWET\2017 Data\_May\81110604

RT: 0.00 - 9.50

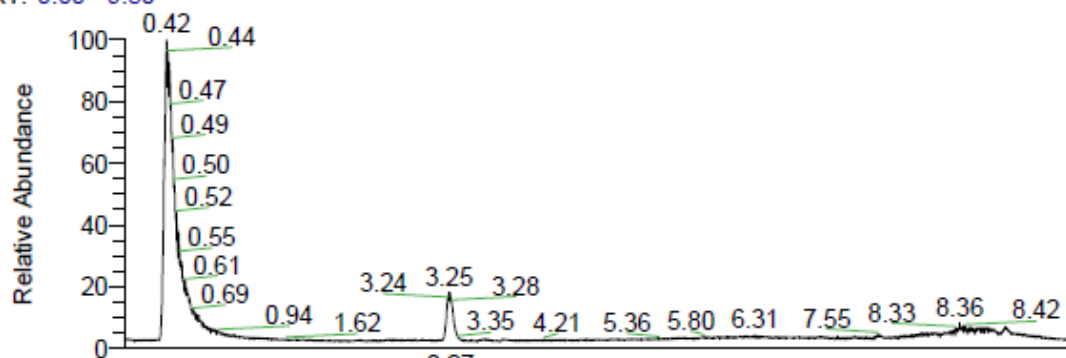

NL:  
3.21E9  
TIC F: FTMS  
+ p ESI Full  
ms  
[120.00-  
1800.00] MS  
81110604

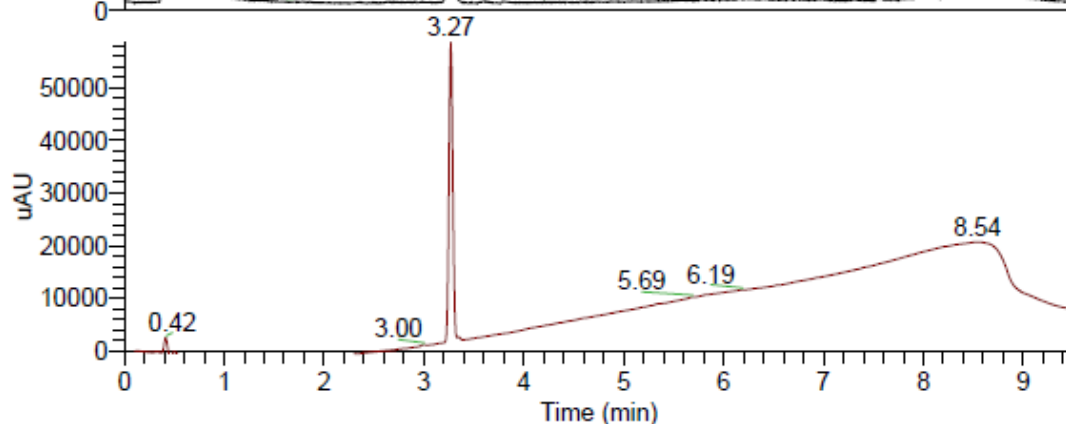

NL:  
5.86E4  
UV\_VIS\_1 UV  
2 81110604

81110604 #1762-1844 RT: 3.20-3.34 AV: 41 NL: 1.71E8

T: FTMS + p ESI Full ms [120.00-1800.00]

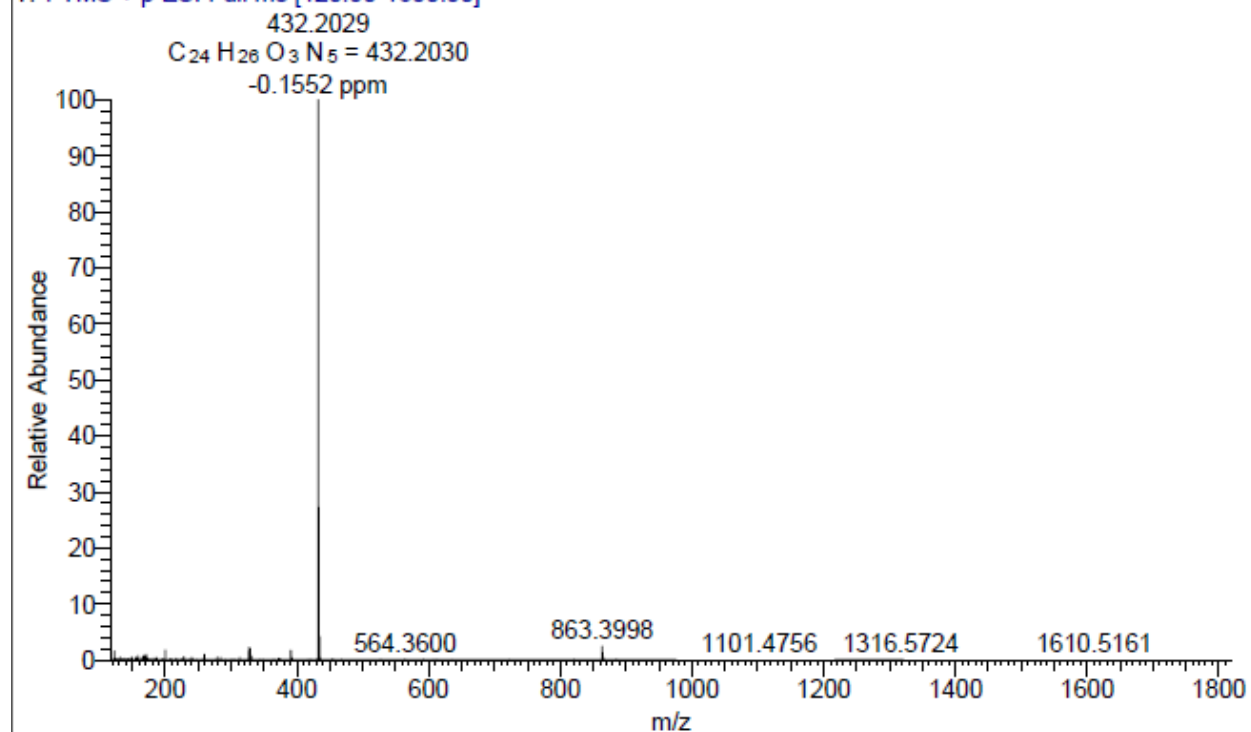

### Supporting Information References:

- 1) Flynn, M.; Huang, O.; Poy, F.; Oppikofer, M.; Bellon, S.; Tang, Y.; Cochran, A.G. A subset of human bromodomains recognizes butyryllysine and crotonyllysine histonepeptide modifications. *Structure* **2015**, *23*, 1801–1814.
- 2) Crawford, T. D.; Tsui, V.; Flynn, E. M.; Wang, S.; Taylor, A. M.; Côté, A.; Audia, J. E.; Beresini, M. H.; Burdick, D. J.; Cummings, R. T.; Dakin, L. A.; Duplessis, M.; Good, A. C.; Hewitt, M. C.; Huang, H.-R.; Jayaram, H.; Kiefer, J. R.; Jiang, Y.; Murray, J. M.; Nasveschuk, C. G.; Pardo, E.; Poy, F.; Romero, F. A.; Tang, Y.; Wang, J.; Xu, Z.; Zawadzke, L. E.; Zhu, X.; Albrecht, B. K.; Magnuson, S. R.; Bellon, S. F.; Cochran, A. G. Diving Into the water: Inducible binding conformations for BRD4, TAF1(2), BRD9, and CECR2 bromodomains. *J. Med. Chem.* **2016**, *59*, 5391–5402.
- 3) Albrecht, B. K.; Gehling, V. S.; Hewitt, M. C.; Vaswani, R. G.; Côté, A.; Leblanc, Y.; Nasveschuk, C. G.; Bellon, S.; Bergeron, L.; Campbell, R.; Cantone, N.; Cooper, M. R.; Cummings, R. T.; Jayaram, H.; Joshi, S.; Mertz, J. A.; Neis, A.; Normant, E.; O'Meara, M.; Pardo, E.; Poy, F.; Sandy, P.; Supko, J.; Sims, R. J. 3rd; Harmange, J. C.; Taylor, A. M.; Audia, J. E. Identification of a benzoisoxazoloazepine inhibitor (CPI-0610) of the bromodomain and extra-terminal (BET) family as a candidate for human clinical trials. *J Med Chem.* **2016**, *59*, 1330–1339.
- 4) Albrecht, Brian K.; Bellon, Steven F.; Burdick, Daniel J.; Cote, Alexandre; Crawford, Terry; Dakin, Les A.; Hewitt, Michael Charles; Hsiao-Wei Tsui, Vickie; Leblanc, Yves; Magnuson, Steven R.; et al. Pyrrolopyridinones as bromodomain inhibitors and their preparation. **WO 2016077380 A1**.
- 5) Ianeyski, A.; He, L.; Aittokallio, T.; Tang, J. SynergyFinder: a web application for analyzing drug combination dose-response matrix data. *Bioinformatics* **2017** *33*, 2413–2415.
